# Supplementary material for: Heat-induced longevity in budding yeast requires respiratory metabolism and glutathione recycling
Source: Aging (Albany NY). 2018 Sep 17;10(9):2407–27. doi: 10.18632/aging.101560 (PMC6188503; doi:10.18632/aging.101560)
Supplement: Table S1 [file aging-10-101560-s002.xlsx]

## Sheet: Pm All Transcripts
geneID

## Sheet: Pm All Significant Transcripts
geneID

## Sheet: Pm Significantly Upregulated Tr
geneID

## Sheet: Pm Significantly Downregulated 
geneID

## Sheet: PmHS All Transcripts
geneID

## Sheet: PmHS All Significant Transcript
geneID

## Sheet: PmHS Significantly Upregulated 
geneID

## Sheet: PmHS Significantly Downregulate
geneID

## Sheet: WtHS All Transcripts
geneID

## Sheet: WtHS All Significant Transcript
geneID

[truncated: 2 more sheets: WtHS Significantly Upregulated , WtHS Significantly Downregulate]
