# Supplementary material for: Heat-induced longevity in budding yeast requires respiratory metabolism and glutathione recycling
Source: Aging (Albany NY). 2018 Sep 17;10(9):2407–27. doi: 10.18632/aging.101560 (PMC6188503; doi:10.18632/aging.101560)
Supplement: Table S2 [file aging-10-101560-s003.xlsx]

## Sheet: qPCR primers
			FWD primer	RC primer
	YGR240C	PFK1	ATG CAA TCT CAA GAT TCA TGC TAC G	TCA ACC ATT TCA CAG ATT CTT TCC AAA
	YHR174W	ENO2	ATG GCT GTC TCT AAA GTT TAC GCT AG	TTG GTC CCT AAC ATC TAG GTT GGC C
	YBR196C	PGI1	ATG TCT GAA CCA GCT CAA AAG AAA CAA AA	ATG TCT GAA CCA GCT CAA AAG AAA CAA AA
	YAL038W	PYK1	ATG TCT AGA TTA GAA AGA TTG ACC TCA TTA AA	TAC AAT TCT TCG GAC TTT CTG GCG TT
	YNR001C	CIT1	ATG TCA GCG ATA TTA TCA ACA ACT AGC AA	GGT TTT ACC GTG TTC TTT CTT GAA TTT TTT A
	YOR136W	IDH1	GCT TAA CAG AAC AAT TGC TAA GA	GTT GAT GAT TTC ATT CGT GAA GTC
	YPL262W	FUM1	ATG TTG AGA TTT ACC AAT TGT AGT TGC AAG	AGG CAA TGG CAT TCT TTC ACG AGC
	YKL085W	MDH1	ATG TTG TCA AGA GTA GCT AAA CGT GC	CTC TTC TGG AGT AAA CCC CTT GAC
	YLR304C	ACO1	GCTAATAACTGGCCATTGGATGTCA	AAGGTTTCTAATTGGCCATCACGTT
	Q0105	COB	ATG GCA TTT AGA AAA TCA AAT GTG TAT TTA AGT T	TAT GCA CAT CTC TTA TAA TAT GTT CAA CAG A
	YOR065W	CYT1	ATG TTT TCA AAT CTA TCT AAA CGT TGG G	CTA CTT TCT TGG TTT TGG TGG ATT GA
	Q0045	COX1	ATG GTA CAA AGA TGA TTA TAT TCA ACA AAT GC	ATT AAA GCA GGC ATT ACT AAG AAG AAA ATC A
	Q0250	COX2	ATG TTA GAT TTA TTA AGA TTA CAA TTA ACA ACA TTC AT	GTC CAT GTT TAA TAT ATT TAT ATG CAA TAG GAT T
	YGL187C	COX4	ATG CTT TCA CTA CGT CAA TCT ATA AGA TTT TT	TCT AAC CTA GCT AAA CCA GTT TCT TGA T
	YBL099W	ATP1	ATG TTG GCT CGT ACT GCT GCT ATT C	GCA ATA CCA TCA CCG ACT GCA AG
	Q0085	ATP6	ATG TTT AAT TTA TTA AAT ACA TAT ATT ACA TCA CCA TTA	TAA ATA GCT TCT TGT GAA ATT AAT CAT CTT GAA C
	YPR020W	ATP20	ATG CTA AGC AGG ATC CAA AAT TAT ACC A	TCT GTA GGC TTT AGA GCA AAG TTT AGG
	YGL205W	POX1	GTTGGGTGATTATACTGAAATTTGG	CCTTTGTAATTTCATCGGAAATATG
	YIL160C	POT1	GGTAAGGGTGAATCGAAGAGGAAGA	AGTTCAAATCAGCCCTCAAAGGTTC
	YJR104C	SOD1	ATG GTT CAA GCA GTC GCA GTG TTA AA	TTG AAA GGA TTG AAG TGA GGA CCA G
	YHR008C	SOD2	ATG TTC GCG AAA ACA GCA GCT GC	ATT GGT CAA CAG CAG TGT TGA ATC C
	YER100W	UBC6	ATG GCT ACA AAG CAG GCT CAC AAG	GGT TTG TAT GGA TAA TCA GAC GGG AA
	YBR072W	HSP26	ATG TCA TTT AAC AGT CCA TTT TTT G	TTA GTT ACC CCA CGA TTC TTG A
	YDR171W	HSP42	ATG AGT TTT TAT CAA CCA TCC CTA TCT	CAA TTT TCT ACC GTA GGG TTG GG
	YAL005C	SSA1	ATG TCA AAA GCT GTC GGT ATT GAT TTA	CTC TCA AGA CCT TTT CAA CTG GG
	YLL026W	HSP104	ATG AAC GAC CAA ACG CAA TTT ACA G	ACA AGA AAT ATC AAC TAA ATC CAA AGC A
	YGR088W	CTT1	ATG AAC GTG TTC GGT AAA AAA GAA GAA A	TTA ATT GGC ACT TGC AAT GGA CCA A
	YDR256C	CTA1	ATG TCG AAA TTG GGA CAA GAA AAA AAT G	TCA AAA TTT GGA GTT ACT CGA AAG CTC
	YPL091W	GLR1	ATG CTT TCT GCA ACC AAA CAA ACA TTT	TCA TCT CAT AGT AAC CAA TTC TTC TGC
	YJL101C	GSH1	ATG GGA CTC TTA GCT TTG GGC A	TTA ACA TTT GCT TTC TAT TGA AGG CTT ATT
	YNL241C	ZWF1	ATG AGT GAA GGC CCC GTC AAA TT	CTA ATT ATC CTT CGT ATC TTC TGG CT
	YPR035W	GLN1	GCT TGT TTG TAT GCC GGA TT	CGT TCC AGT CAC CCT TCA AT
	YKR039W	GAP1	AGG GTT TGC CAA GTG TTG TC	AAC GCA ATA AGA CCG AAT GC
	YNL142W	MEP2	TGT GGA TTA TGG TCC CAG GT	CGA AAC CCA AAG AAT TCC AA

## Sheet: cloning primers
Upstream flanking region of glr1
FW1_glr1	GTT TGC GTT TGT TGG TCA ATT CTA
RC1_glr1	TAT GTC GAC AAA GTT CTG TAA ACT AAT
Downstream flanking region of glr1
FW2_glr1	TAT GAG CTC AGC AAC GAA ACT AGA CGT
RC2_glr1	ACC AAA GAG CTT TGA AGG TCA GA
Upstream flanking region of hap4
FW1_hap4	TCGATTTTGCAGATTGTTCTAAAAGTAAAT
RC1_hap4	TATCAGCTGAAAGTCTTTGCGGTCAT
Downstream flanking region of hap4
FW2_hap4	TATGAGCTCAATAGGCATGTTGCAATA
RC2_hap4	TCTCTTGACGTGTTTCACCATACG
Hygromycin resistance cassette, amplified from pAG32
FW_HygB	CGTACGCTGCAGGTCGAC
RC_HygB	ATCGATGAATTCGAGCTCG
